# Supplementary material for: Exploratory Transcriptomic Profiling Reveals the Role of Gut Microbiota in Vascular Dementia
Source: MDPI journal article supplement (doi:10.3390/ijms24098091), 2023-04-30
Supplement: s1 [file s1]

## Exploratory Transcriptomic Profiling Reveals the Role of Gut Microbiota in Vascular Dementia

Navdeep Kaur <sup>1</sup>, Geneva LaForce <sup>1</sup>, Deepthi P. Mallela <sup>1</sup>, Prasenjit Prasad Saha <sup>1</sup>, Jennifer Buffa <sup>1</sup>, Xinmin S. Li <sup>1</sup>, Naseer Sangwan <sup>1,2</sup>, Kasia Rothenberg <sup>3</sup> and Weifei Zhu <sup>1,\*</sup>

<sup>1</sup> Department of Cardiovascular & Metabolic Sciences, Cleveland Clinic, Cleveland, OH 44195, USA; kaurn7@ccf.org (N.K.); laforcg@ccf.org (G.L.); malleld@ccf.org (D.P.M.); sahap2@ccf.org (P.P.S.); buffaj@ccf.org (J.B.); lix2@ccf.org (X.S.L.); sangwan@ccf.org (N.S.)

<sup>2</sup> Microbial Sequencing & Analytics Resource (MSAAR) Facility, Shared Laboratory Resources (SLR), Lerner Research Institute, Cleveland Clinic, Cleveland, OH 44195, USA

<sup>3</sup> Cleveland Clinic Lou Ruvo Center for Brain Health, Cleveland, OH 44195, USA; rothenk@ccf.org

\* Correspondence: zhuw@ccf.org; Tel.: +1-216-445-0990

**Table S1:** Differentially expressed genes with highest fold change (up/down) in left brain cortex of mice in choline and control groups.

| Pre         |           |          |          |                |          |           |          | Day 3       |          |          |          |                |          |          |          |
|-------------|-----------|----------|----------|----------------|----------|-----------|----------|-------------|----------|----------|----------|----------------|----------|----------|----------|
| Upregulated |           |          |          | Down-regulated |          |           |          | Upregulated |          |          |          | Down-regulated |          |          |          |
| symbol      | entrez    | logfc    | adjpv    | symbol         | entrez   | logfc     | adjpv    | symbol      | entrez   | logfc    | adjpv    | symbol         | entrez   | logfc    | adjpv    |
| Cyp2a5      | 13087     | 2.404416 | 0.002041 | Prl            | 19109    | -4.353168 | 0.002926 | Ifi206      | 1.03E+08 | 4.288259 | 0.000432 | Pou4f2         | 18997    | -6.17803 | 0.001996 |
| Wnt9b       | 22412     | 1.959597 | 0.004405 | Gh             | 14599    | -4.2244   | 0.005778 | Lcn2        | 16819    | 4.262434 | 0.000001 | Gata3          | 14462    | -4.69422 | 0.000576 |
| Gfy         | 100039953 | 1.881408 | 0.005606 |                |          |           |          | Cd5l        | 11801    | 4.03055  | 0.000281 | Sox14          | 20669    | -4.66157 | 0.001471 |
| Day 1       |           |          |          |                |          |           |          | Phf11a      | 219131   | 3.677417 | 0.003795 | Pax7           | 18509    | -3.86859 | 0.006424 |
| Tgm1        | 21816     | 4.577848 | 0.00025  | Hcrt           | 15171    | -3.329184 | 0.028934 | Saa3        | 20210    | 3.429372 | 0.006763 | Barhl1         | 54422    | -3.71657 | 0.001745 |
| Mmp3        | 17392     | 4.390026 | 0.00018  | Npas4          | 225872   | -2.405589 | 0.000171 | Cga         | 12640    | 3.346448 | 0.036771 | Gm5903         | 546005   | -3.03644 | 0.009947 |
| Slfn4       | 20558     | 3.931423 | 0.00052  | Gm28707        | 1.08E+08 | -2.180096 | 0.013786 | Scgb1c1     | 338417   | 3.298835 | 0.014407 | Lrx2           | 16372    | -2.97009 | 0.004798 |
| Pax7        | 18509     | 3.726796 | 0.028461 | Lrat           | 79235    | -1.991012 | 0.029157 | Ccl4        | 20303    | 3.288576 | 0.00017  | Rny3           | 19874    | -2.82025 | 0.018581 |
| Lilr4b      | 14727     | 3.707754 | 7.14E-05 | Lrrc14b        | 432779   | -1.884303 | 0.02135  | Cxcl10      | 15945    | 3.2142   | 0.00012  | Gm26795        | 1.05E+08 | -2.79683 | 0.006767 |
| Krt75       | 109052    | 3.694855 | 0.000281 | Snord53        | 1E+08    | -1.813964 | 0.00539  | Gh          | 14599    | 2.992638 | 0.034273 | Shox2          | 20429    | -2.77205 | 0.002132 |
| Barhl1      | 54422     | 3.682261 | 0.006382 | Depp1          | 213393   | -1.780384 | 0.00105  | Cxcr2       | 12765    | 2.905243 | 0.013676 | Snord59a       | 1.15E+08 | -2.6818  | 0.036974 |
| Rbp3        | 19661     | 3.681021 | 0.001367 | Wnt8b          | 22423    | -1.649532 | 0.031914 | Afp         | 11576    | 2.868992 | 0.001129 | Smpx           | 66106    | -2.66251 | 0.030002 |
| Ptx3        | 19288     | 3.674518 | 0.000563 |                |          |           |          | Cyp4f18     | 72054    | 2.795326 | 0.000366 | Gm12394        | 1.01E+08 | -2.62272 | 0.000156 |
| ETV3L       | 546801    | 3.580271 | 0.001903 |                |          |           |          | Prl         | 19109    | 2.786142 | 0.044138 | Dmbx1          | 140477   | -2.55422 | 0.003393 |
| Ccl2        | 20296     | 3.564794 | 0.00025  |                |          |           |          | Lilr4b      | 14727    | 2.745565 | 0.000843 | Cer1           | 12622    | -2.51328 | 0.002629 |
| Cxcl1       | 14825     | 3.290339 | 5.09E-05 |                |          |           |          | Slfn4       | 20558    | 2.71014  | 0.007577 | Lhx1           | 16869    | -2.45098 | 0.005104 |
| Crc1        | 74175     | 3.257868 | 0.001135 |                |          |           |          | Ifi204      | 15951    | 2.692151 | 4.63E-06 | Gm25939        | 1.15E+08 | -2.377   | 0.046339 |
| Ccl12       | 20293     | 3.23896  | 0.000294 |                |          |           |          | Cd300lf     | 246746   | 2.687131 | 0.000148 | Ckm            | 12715    | -2.34652 | 0.045615 |
| Cxcl10      | 15945     | 3.161448 | 0.000684 |                |          |           |          | Ifi211      | 381308   | 2.668883 | 0.003465 | Rny1           | 19872    | -2.22011 | 0.0027   |
| Npw         | 381073    | 3.150283 | 0.000448 |                |          |           |          | Tgm1        | 21816    | 2.665939 | 0.023581 | Gm5237         | 383326   | -2.14491 | 0.016225 |
| Hcar2       | 80885     | 2.870404 | 0.008091 |                |          |           |          | Gm33370     | 1.03E+08 | 2.658115 | 0.00921  | Gm24978        | 1.15E+08 | -2.13372 | 0.008985 |
| Apol9a      | 223672    | 2.799433 | 0.012805 |                |          |           |          | Ifi209      | 236312   | 2.651839 | 0.000267 | Atp2a1         | 11937    | -2.11256 | 0.000266 |
| Gata3       | 14462     | 2.795749 | 0.03508  |                |          |           |          | Mmp3        | 17392    | 2.640886 | 0.02582  | Gm48249        | 1.15E+08 | -2.07508 | 0.005051 |
| Serpinb5    | 20724     | 2.738153 | 0.000247 |                |          |           |          | Mx1         | 17857    | 2.595755 | 0.00012  | Rbp3           | 19661    | -2.05321 | 0.032884 |
| Msr1        | 20288     | 2.706369 | 5.2E-05  |                |          |           |          | Zbp1        | 58203    | 2.543091 | 0.000149 | Foxb1          | 64290    | -2.01172 | 0.045135 |
| Lif         | 16878     | 2.689888 | 0.000284 |                |          |           |          | Ifi2712a    | 76933    | 2.526809 | 0.000001 | Wnt9b          | 22412    | -1.97826 | 0.001718 |
| Fpr2        | 14289     | 2.54672  | 0.006344 |                |          |           |          | Ccl12       | 20293    | 2.497871 | 0.002881 | Hs6st3         | 50787    | -1.96594 | 0.000001 |

|          |        |          |          |  |  |  |  |               |        |          |          |               |          |          |          |
|----------|--------|----------|----------|--|--|--|--|---------------|--------|----------|----------|---------------|----------|----------|----------|
| Cryba2   | 12958  | 2.535041 | 1.94E-05 |  |  |  |  | Gm12297       | 668323 | 2.493415 | 0.017839 | Pcdha1        | 116731   | -1.9557  | 0.000001 |
| Fam83g   | 69640  | 2.50539  | 0.000395 |  |  |  |  | Al662270      | 1E+08  | 2.489103 | 0.001876 | Gm38058       | 1.05E+08 | -1.95349 | 0.001371 |
| Il11     | 16156  | 2.498481 | 5.24E-06 |  |  |  |  | Msr1          | 20288  | 2.477537 | 5.48E-05 | Tpd52-ps      | 107730   | -1.92201 | 0.023478 |
| Mmp12    | 17381  | 2.488482 | 0.03701  |  |  |  |  | lsg15         | 1E+08  | 2.449203 | 3.42E-06 | Gm46563       | 1.08E+08 | -1.9102  | 0.014768 |
| Cst7     | 13011  | 2.488404 | 0.005434 |  |  |  |  | Arg1          | 11846  | 2.447362 | 0.001583 | Gm21297       | 1.01E+08 | -1.89136 | 0.017134 |
| Bdkrb2   | 12062  | 2.485501 | 0.000001 |  |  |  |  | Clec4d        | 17474  | 2.446059 | 0.046051 | Gm10010       | 434089   | -1.83031 | 0.000001 |
| Ccl7     | 20306  | 2.465872 | 0.006233 |  |  |  |  | Ccl8          | 20307  | 2.411758 | 0.000853 | Myh4          | 17884    | -1.81042 | 7.41E-05 |
| Cd44     | 12505  | 2.449625 | 5.38E-06 |  |  |  |  | Ifi207        | 226691 | 2.409409 | 2.6E-06  | Pik3c2g       | 18705    | -1.78674 | 0.009965 |
| P2ry2    | 18442  | 2.434637 | 0.000001 |  |  |  |  | Plac8         | 231507 | 2.408942 | 0.003606 | Gm15462       | 1.08E+08 | -1.78329 | 0.020651 |
| Cd244a   | 18106  | 2.418923 | 0.011008 |  |  |  |  | BC023105      | 667597 | 2.398616 | 0.016846 | Gm5830        | 545332   | -1.74723 | 0.033144 |
| Milr1    | 380732 | 2.404962 | 0.000718 |  |  |  |  | Glycam1       | 14663  | 2.392136 | 0.001993 | Gla1          | 14654    | -1.6423  | 0.020232 |
| Serpinf2 | 18816  | 2.38817  | 0.000553 |  |  |  |  | Apol9a        | 223672 | 2.392033 | 0.003152 | Kcnh5         | 238271   | -1.63881 | 0.000001 |
| Clcf1    | 56708  | 2.364962 | 0.000001 |  |  |  |  | Gm12104       | 1E+08  | 2.384326 | 0.044887 | Ush2a         | 22283    | -1.60327 | 0.025735 |
| Timp1    | 21857  | 2.348033 | 0.002202 |  |  |  |  | Ptx3          | 19288  | 2.379121 | 0.021704 | Gm26560       | 1.03E+08 | -1.60229 | 0.03539  |
| S100a8   | 20201  | 2.335234 | 7.09E-05 |  |  |  |  | 9330175E14Rik | 320377 | 2.375727 | 0.000147 | Exp5          | 320051   | -1.60224 | 0.000001 |
| Gdf15    | 23886  | 2.325783 | 0.000893 |  |  |  |  | Oas1g         | 23960  | 2.375218 | 0.00023  | Pakap         | 677884   | -1.59749 | 0.000001 |
| Tmem40   | 94346  | 2.249585 | 0.000001 |  |  |  |  | Cd300ld       | 217305 | 2.356666 | 0.009142 | Gm12462       | 1.01E+08 | -1.59009 | 0.007753 |
| Gja3     | 14611  | 2.199436 | 9.15E-05 |  |  |  |  | Lilrb4a       | 14728  | 2.355949 | 0.000128 | Tfap2b        | 21419    | -1.58273 | 0.003268 |
| Tubb6    | 67951  | 2.184872 | 0.001652 |  |  |  |  | Clec7a        | 56644  | 2.352357 | 0.000001 | 6330411D24Rik | 70725    | -1.56637 | 0.036994 |
| Bcl3     | 12051  | 2.172518 | 0.000555 |  |  |  |  | Gm4841        | 225594 | 2.350735 | 0.045424 | Chrna6        | 11440    | -1.56331 | 0.006304 |
| Cd300lf  | 246746 | 2.168166 | 0.012073 |  |  |  |  | 2700078F05Rik | 72626  | 2.321723 | 0.012689 | Gm6430        | 623430   | -1.55447 | 0.038675 |
| Loxhd1   | 240411 | 2.165585 | 5.25E-05 |  |  |  |  | S100a4        | 20198  | 2.304241 | 0.0144   | Gm15723       | 1.03E+08 | -1.54713 | 6.24E-05 |
| Klk2-ps  | 16603  | 2.14369  | 0.005589 |  |  |  |  | Phf11b        | 236451 | 2.302384 | 0.000119 | Slc9a7        | 236727   | -1.54662 | 0.000001 |
| Lilrb4a  | 14728  | 2.141679 | 0.001697 |  |  |  |  | Fcgr4         | 246256 | 2.296147 | 0.001213 | Nt5c1a        | 230718   | -1.54213 | 0.000001 |
| Wnt9b    | 22412  | 2.131315 | 0.000337 |  |  |  |  | Ccl3          | 20302  | 2.27883  | 0.001347 | Gdf7          | 238057   | -1.53564 | 0.011957 |
| Emp1     | 13730  | 2.116216 | 1.51E-06 |  |  |  |  | Ms4a4c        | 64380  | 2.276792 | 0.006767 |               |          |          |          |
| Serpine1 | 18787  | 2.089896 | 0.00011  |  |  |  |  | Al427809      | 381524 | 2.273888 | 0.007515 |               |          |          |          |
| Has2     | 15117  | 2.077019 | 0.001022 |  |  |  |  | Cxcl1         | 14825  | 2.270783 | 0.00537  |               |          |          |          |

|               |           |          |          |  |  |  |  |               |          |          |          |  |  |  |  |
|---------------|-----------|----------|----------|--|--|--|--|---------------|----------|----------|----------|--|--|--|--|
| Drd4          | 13491     | 2.073883 | 0.007889 |  |  |  |  | Gm36738       | 1.03E+08 | 2.261474 | 0.003305 |  |  |  |  |
| Selp          | 20344     | 2.059762 | 0.030245 |  |  |  |  | Tspan32       | 27027    | 2.245872 | 0.000109 |  |  |  |  |
| Rufy4         | 435626    | 2.055115 | 0.011455 |  |  |  |  | Timp1         | 21857    | 2.211824 | 0.001729 |  |  |  |  |
| Gm6477        | 624165    | 2.045394 | 0.007995 |  |  |  |  | Cd244a        | 18106    | 2.186262 | 0.011451 |  |  |  |  |
| Helt          | 234219    | 2.011196 | 0.001121 |  |  |  |  | Osm           | 18413    | 2.183298 | 0.007431 |  |  |  |  |
| Socs3         | 12702     | 2.009069 | 6.13E-06 |  |  |  |  | Lvrn          | 74574    | 2.17465  | 0.040951 |  |  |  |  |
| Flnc          | 68794     | 2.001892 | 0.000846 |  |  |  |  | Ifi213        | 623121   | 2.147552 | 0.000392 |  |  |  |  |
| Epcam         | 17075     | 1.951101 | 0.007503 |  |  |  |  | Cd52          | 23833    | 2.145765 | 0.000001 |  |  |  |  |
| Glrp1         | 14659     | 1.942994 | 0.048898 |  |  |  |  | Ska1          | 66468    | 2.145742 | 0.001431 |  |  |  |  |
| Oasl1         | 231655    | 1.942736 | 0.009746 |  |  |  |  | Ms4a6c        | 73656    | 2.103491 | 0.000001 |  |  |  |  |
| Spp1          | 20750     | 1.937613 | 0.000001 |  |  |  |  | Gm12250       | 631323   | 2.087984 | 8.77E-05 |  |  |  |  |
| Gm10146       | 100041500 | 1.905186 | 0.048109 |  |  |  |  | Oas3          | 246727   | 2.082936 | 0.008599 |  |  |  |  |
| Areg          | 11839     | 1.896804 | 0.03155  |  |  |  |  | Ccl2          | 20296    | 2.08049  | 0.025697 |  |  |  |  |
| Cd28          | 12487     | 1.873203 | 0.000838 |  |  |  |  | 1810073O08Rik | 72285    | 2.065749 | 0.008838 |  |  |  |  |
| Fndc9         | 320116    | 1.871577 | 1.1E-05  |  |  |  |  | Trim30b       | 244183   | 2.060661 | 0.000169 |  |  |  |  |
| Ppm1j         | 71887     | 1.870028 | 0.0005   |  |  |  |  | Hcar2         | 80885    | 2.049968 | 0.040129 |  |  |  |  |
| Fndc7         | 320181    | 1.845089 | 0.009748 |  |  |  |  | H19           | 14955    | 2.04641  | 0.000153 |  |  |  |  |
| Usp18         | 24110     | 1.841907 | 0.001724 |  |  |  |  | 2900076G11Rik | 73052    | 2.046095 | 0.006892 |  |  |  |  |
| Tnn           | 329278    | 1.833778 | 0.000323 |  |  |  |  | Padi1         | 18599    | 2.040353 | 0.030987 |  |  |  |  |
| Gm4951        | 240327    | 1.82468  | 0.005563 |  |  |  |  | A930001C03Rik | 319314   | 2.039156 | 0.025343 |  |  |  |  |
| Gm10791       | 100038614 | 1.820468 | 0.001952 |  |  |  |  | Usp18         | 24110    | 2.038324 | 8.16E-05 |  |  |  |  |
| Tnfrsf12a     | 27279     | 1.786689 | 5.59E-05 |  |  |  |  | Cyp21a2-ps    | 632302   | 2.037824 | 0.016326 |  |  |  |  |
| S100a9        | 20202     | 1.775071 | 0.010382 |  |  |  |  | Chil3         | 12655    | 2.03237  | 0.004846 |  |  |  |  |
| 6430628N08Rik | 76237     | 1.761512 | 0.00026  |  |  |  |  | Pilra         | 231805   | 2.025128 | 0.000229 |  |  |  |  |
| Ccl4          | 20303     | 1.753613 | 0.043986 |  |  |  |  | Ddx60         | 234311   | 2.016919 | 0.000001 |  |  |  |  |
| Gldn          | 235379    | 1.74923  | 2.29E-06 |  |  |  |  | Mcoln2        | 68279    | 2.014875 | 0.042477 |  |  |  |  |
| Ifi204        | 15951     | 1.746395 | 0.017245 |  |  |  |  | Tnfrsf26      | 244237   | 2.010884 | 0.049942 |  |  |  |  |

|               |           |          |          |  |  |  |  |               |          |          |          |  |  |  |  |
|---------------|-----------|----------|----------|--|--|--|--|---------------|----------|----------|----------|--|--|--|--|
| Zbp1          | 58203     | 1.726513 | 0.030282 |  |  |  |  | Gm26739       | 1.03E+08 | 2.002909 | 0.046091 |  |  |  |  |
| Hspb1         | 15507     | 1.707225 | 0.000001 |  |  |  |  | Gm1966        | 434223   | 1.99918  | 0.000783 |  |  |  |  |
| Gbp6          | 100702    | 1.701746 | 0.000922 |  |  |  |  | Aoc1          | 76507    | 1.990454 | 0.045912 |  |  |  |  |
| Gm4070        | 100042856 | 1.699077 | 0.005437 |  |  |  |  | Plxna4os1     | 319849   | 1.979057 | 1.16E-05 |  |  |  |  |
| Chil3         | 12655     | 1.690709 | 0.04551  |  |  |  |  | C3            | 12266    | 1.976125 | 4.4E-06  |  |  |  |  |
| Tnfaip2       | 21928     | 1.685262 | 8.05E-05 |  |  |  |  | Ifi44         | 99899    | 1.971615 | 0.000159 |  |  |  |  |
| 9330175E14Rik | 320377    | 1.681914 | 0.018227 |  |  |  |  | Ly9           | 17085    | 1.965365 | 0.000001 |  |  |  |  |
| AA467197      | 433470    | 1.675375 | 0.013002 |  |  |  |  | Gm4951        | 240327   | 1.96453  | 0.000279 |  |  |  |  |
| Col27a1       | 373864    | 1.674806 | 0.000001 |  |  |  |  | Pkp3          | 56460    | 1.963734 | 0.043439 |  |  |  |  |
| Ifi207        | 226691    | 1.668717 | 0.007086 |  |  |  |  | Cdk1          | 12534    | 1.963525 | 1.86E-05 |  |  |  |  |
| Gimap4        | 107526    | 1.658516 | 0.000494 |  |  |  |  | Cxcl5         | 20311    | 1.955344 | 0.002315 |  |  |  |  |
| Mx1           | 17857     | 1.65505  | 0.042782 |  |  |  |  | Oasl1         | 231655   | 1.954119 | 0.001642 |  |  |  |  |
| Dnmt3l        | 54427     | 1.651336 | 0.034793 |  |  |  |  | Gm24608       | 1.15E+08 | 1.950373 | 0.046876 |  |  |  |  |
| Rsad2         | 58185     | 1.649832 | 0.000639 |  |  |  |  | Oas1a         | 246730   | 1.949236 | 1.56E-05 |  |  |  |  |
| Ccr1          | 12768     | 1.639494 | 0.023172 |  |  |  |  | Ifi208        | 1E+08    | 1.94682  | 0.033539 |  |  |  |  |
| Lgals3        | 16854     | 1.635513 | 0.003085 |  |  |  |  | Aurkb         | 20877    | 1.940512 | 4.64E-05 |  |  |  |  |
| Adam5         | 11499     | 1.634262 | 0.042272 |  |  |  |  | Tk1           | 21877    | 1.936247 | 1.75E-06 |  |  |  |  |
| Rgs13         | 246709    | 1.616832 | 0.000207 |  |  |  |  | Irf7          | 54123    | 1.932717 | 6.09E-06 |  |  |  |  |
| Akr1b8        | 14187     | 1.607128 | 0.000294 |  |  |  |  | Ccl5          | 20304    | 1.92346  | 0.026922 |  |  |  |  |
| Sdc1          | 20969     | 1.607033 | 6.24E-05 |  |  |  |  | Ankle1        | 234396   | 1.910549 | 7.08E-05 |  |  |  |  |
| H19           | 14955     | 1.596965 | 0.009774 |  |  |  |  | Neil3         | 234258   | 1.910236 | 0.00022  |  |  |  |  |
| Mcomp1        | 69189     | 1.568241 | 0.009578 |  |  |  |  | 4930474N09Rik | 67639    | 1.895032 | 0.032749 |  |  |  |  |
| Slamf8        | 74748     | 1.553444 | 0.035113 |  |  |  |  | Phf11d        | 219132   | 1.892799 | 8.18E-06 |  |  |  |  |
| Ntf5          | 78405     | 1.552736 | 0.008961 |  |  |  |  | Milr1         | 380732   | 1.881361 | 0.000246 |  |  |  |  |
| Atp2a1        | 11937     | 1.55229  | 0.023507 |  |  |  |  | F830016B08Rik | 240328   | 1.879675 | 0.012562 |  |  |  |  |
| Lpo           | 76113     | 1.551631 | 0.00036  |  |  |  |  | 1600010M07Rik | 69781    | 1.86977  | 0.011053 |  |  |  |  |
| Gfap          | 14580     | 1.549129 | 0.000908 |  |  |  |  | Il18rap       | 16174    | 1.868187 | 0.00796  |  |  |  |  |
| Gm24339       | 115487283 | 1.544039 | 0.046317 |  |  |  |  | S100a9        | 20202    | 1.867289 | 0.00404  |  |  |  |  |

|                   |        |          |          |  |  |  |  |                   |          |          |          |  |  |  |  |
|-------------------|--------|----------|----------|--|--|--|--|-------------------|----------|----------|----------|--|--|--|--|
| Plaur             | 18793  | 1.537554 | 6.96E-05 |  |  |  |  | Bik               | 12124    | 1.866859 | 0.035038 |  |  |  |  |
| F2rl2             | 14064  | 1.537444 | 2.07E-05 |  |  |  |  | Bst2              | 69550    | 1.861487 | 0.000001 |  |  |  |  |
| Tafa3             | 329731 | 1.536897 | 0.036677 |  |  |  |  | Lgals3            | 16854    | 1.850953 | 0.000139 |  |  |  |  |
| Clec7a            | 56644  | 1.530771 | 0.002262 |  |  |  |  | Apob              | 238055   | 1.848731 | 0.030962 |  |  |  |  |
| Fgr               | 14191  | 1.529849 | 0.041384 |  |  |  |  | Pbk               | 52033    | 1.845922 | 4.44E-05 |  |  |  |  |
| A73004<br>3L09Rik | 330958 | 1.518965 | 0.015612 |  |  |  |  | Cd300lb           | 217304   | 1.84569  | 0.047395 |  |  |  |  |
| Lox               | 16948  | 1.514877 | 0.001251 |  |  |  |  | Oas2              | 246728   | 1.844642 | 3.44E-05 |  |  |  |  |
| Hbegf             | 15200  | 1.511315 | 2.03E-06 |  |  |  |  | Ifit3             | 15959    | 1.826746 | 0.000001 |  |  |  |  |
| Snai3             | 30927  | 1.503418 | 0.001085 |  |  |  |  | Gm6581            | 625409   | 1.821235 | 0.046501 |  |  |  |  |
| Il1b              | 16176  | 1.502793 | 0.003321 |  |  |  |  | Gm1920<br>9       | 1E+08    | 1.818946 | 0.006663 |  |  |  |  |
|                   |        |          |          |  |  |  |  | Spp1              | 20750    | 1.812654 | 0.000001 |  |  |  |  |
|                   |        |          |          |  |  |  |  | Rtp4              | 67775    | 1.807071 | 0.000001 |  |  |  |  |
|                   |        |          |          |  |  |  |  | Cst7              | 13011    | 1.806014 | 0.006315 |  |  |  |  |
|                   |        |          |          |  |  |  |  | Siglec1           | 20612    | 1.805287 | 0.000277 |  |  |  |  |
|                   |        |          |          |  |  |  |  | Gm1086<br>2       | 1E+08    | 1.802859 | 0.006836 |  |  |  |  |
|                   |        |          |          |  |  |  |  | Gm553             | 227091   | 1.785662 | 0.039668 |  |  |  |  |
|                   |        |          |          |  |  |  |  | Icos              | 54167    | 1.772254 | 0.010965 |  |  |  |  |
|                   |        |          |          |  |  |  |  | Gm1532<br>7       | 1.01E+08 | 1.768917 | 0.033681 |  |  |  |  |
|                   |        |          |          |  |  |  |  | B430306<br>N03Rik | 320148   | 1.768147 | 0.000472 |  |  |  |  |
|                   |        |          |          |  |  |  |  | Itgax             | 16411    | 1.752233 | 9.69E-06 |  |  |  |  |
|                   |        |          |          |  |  |  |  | Bcl3              | 12051    | 1.750536 | 0.003465 |  |  |  |  |
|                   |        |          |          |  |  |  |  | Ifi30             | 65972    | 1.740273 | 0.000001 |  |  |  |  |
|                   |        |          |          |  |  |  |  | Klk6              | 19144    | 1.739374 | 0.000001 |  |  |  |  |
|                   |        |          |          |  |  |  |  | AA46719<br>7      | 433470   | 1.738767 | 0.001724 |  |  |  |  |
|                   |        |          |          |  |  |  |  | Oas1b             | 23961    | 1.730292 | 6.31E-05 |  |  |  |  |
|                   |        |          |          |  |  |  |  | Ube2c             | 68612    | 1.724392 | 0.000252 |  |  |  |  |
|                   |        |          |          |  |  |  |  | Tlr2              | 24088    | 1.718451 | 0.000001 |  |  |  |  |
|                   |        |          |          |  |  |  |  | Tnfsf8            | 21949    | 1.717056 | 0.040074 |  |  |  |  |
|                   |        |          |          |  |  |  |  | Cdca5             | 67849    | 1.71683  | 0.018842 |  |  |  |  |

|  |  |  |  |  |  |  |  |               |          |          |          |  |  |  |  |
|--|--|--|--|--|--|--|--|---------------|----------|----------|----------|--|--|--|--|
|  |  |  |  |  |  |  |  | Ccr1          | 12768    | 1.716309 | 0.005811 |  |  |  |  |
|  |  |  |  |  |  |  |  | Nlrc5         | 434341   | 1.705795 | 0.000001 |  |  |  |  |
|  |  |  |  |  |  |  |  | Steap4        | 117167   | 1.704135 | 0.000196 |  |  |  |  |
|  |  |  |  |  |  |  |  | Mx2           | 17858    | 1.70226  | 2.26E-06 |  |  |  |  |
|  |  |  |  |  |  |  |  | Pirb          | 18733    | 1.689721 | 1.37E-05 |  |  |  |  |
|  |  |  |  |  |  |  |  | Vim           | 22352    | 1.687308 | 1.66E-05 |  |  |  |  |
|  |  |  |  |  |  |  |  | Dyrk4         | 101320   | 1.685305 | 0.00136  |  |  |  |  |
|  |  |  |  |  |  |  |  | Ms4a6d        | 68774    | 1.679912 | 0.000001 |  |  |  |  |
|  |  |  |  |  |  |  |  | Ifit3b        | 667370   | 1.669798 | 2.15E-06 |  |  |  |  |
|  |  |  |  |  |  |  |  | Slfn9         | 237886   | 1.667366 | 0.000458 |  |  |  |  |
|  |  |  |  |  |  |  |  | Batf          | 53314    | 1.662503 | 0.001373 |  |  |  |  |
|  |  |  |  |  |  |  |  | Serpina3<br>n | 20716    | 1.661562 | 7.34E-05 |  |  |  |  |
|  |  |  |  |  |  |  |  | Slamf6        | 30925    | 1.659072 | 4.25E-05 |  |  |  |  |
|  |  |  |  |  |  |  |  | Mmp13         | 17386    | 1.652609 | 0.036547 |  |  |  |  |
|  |  |  |  |  |  |  |  | Cybb          | 13058    | 1.647281 | 6.14E-05 |  |  |  |  |
|  |  |  |  |  |  |  |  | Pimreg        | 109212   | 1.645763 | 0.001284 |  |  |  |  |
|  |  |  |  |  |  |  |  | Uhrf1         | 18140    | 1.645173 | 0.000001 |  |  |  |  |
|  |  |  |  |  |  |  |  | Oasl2         | 23962    | 1.645147 | 6.56E-05 |  |  |  |  |
|  |  |  |  |  |  |  |  | Slamf8        | 74748    | 1.634947 | 0.019128 |  |  |  |  |
|  |  |  |  |  |  |  |  | Ifitm3        | 66141    | 1.634034 | 0.000001 |  |  |  |  |
|  |  |  |  |  |  |  |  | ligp1         | 60440    | 1.629524 | 2.91E-05 |  |  |  |  |
|  |  |  |  |  |  |  |  | Arl11         | 219144   | 1.627967 | 0.000001 |  |  |  |  |
|  |  |  |  |  |  |  |  | Dhh           | 13363    | 1.627165 | 0.030688 |  |  |  |  |
|  |  |  |  |  |  |  |  | Ppp1r18<br>os | 1.01E+08 | 1.626003 | 0.012356 |  |  |  |  |
|  |  |  |  |  |  |  |  | Epsti1        | 108670   | 1.617884 | 0.000001 |  |  |  |  |
|  |  |  |  |  |  |  |  | Ch25h         | 12642    | 1.61737  | 1.43E-06 |  |  |  |  |
|  |  |  |  |  |  |  |  | S100a8        | 20201    | 1.610968 | 0.004297 |  |  |  |  |
|  |  |  |  |  |  |  |  | Plbd1         | 66857    | 1.609225 | 0.006716 |  |  |  |  |
|  |  |  |  |  |  |  |  | Sap30bp<br>os | 1.01E+08 | 1.60453  | 0.000111 |  |  |  |  |
|  |  |  |  |  |  |  |  | Psmb8         | 16913    | 1.604049 | 0.000001 |  |  |  |  |

|  |  |  |  |  |  |  |  |                   |          |          |          |  |  |  |  |
|--|--|--|--|--|--|--|--|-------------------|----------|----------|----------|--|--|--|--|
|  |  |  |  |  |  |  |  | Birc5             | 11799    | 1.598554 | 0.000001 |  |  |  |  |
|  |  |  |  |  |  |  |  | Gpr65             | 14744    | 1.588515 | 0.005436 |  |  |  |  |
|  |  |  |  |  |  |  |  | Cd72              | 12517    | 1.583529 | 0.00011  |  |  |  |  |
|  |  |  |  |  |  |  |  | Pclaf             | 68026    | 1.583471 | 0.00075  |  |  |  |  |
|  |  |  |  |  |  |  |  | Gm2656<br>4       | 1.03E+08 | 1.575443 | 0.014209 |  |  |  |  |
|  |  |  |  |  |  |  |  | Trem12            | 328833   | 1.575044 | 0.000473 |  |  |  |  |
|  |  |  |  |  |  |  |  | Gm1218<br>5       | 620913   | 1.57489  | 0.013055 |  |  |  |  |
|  |  |  |  |  |  |  |  | Fcgr1             | 14129    | 1.555369 | 3.94E-06 |  |  |  |  |
|  |  |  |  |  |  |  |  | S100a6            | 20200    | 1.54973  | 0.000001 |  |  |  |  |
|  |  |  |  |  |  |  |  | Casp4             | 12363    | 1.544363 | 2.26E-05 |  |  |  |  |
|  |  |  |  |  |  |  |  | Trim30a           | 20128    | 1.5442   | 0.000001 |  |  |  |  |
|  |  |  |  |  |  |  |  | Hp                | 15439    | 1.543442 | 0.028784 |  |  |  |  |
|  |  |  |  |  |  |  |  | Troap             | 78733    | 1.540657 | 0.000493 |  |  |  |  |
|  |  |  |  |  |  |  |  | F630028<br>O10Rik | 1E+08    | 1.539632 | 0.002727 |  |  |  |  |
|  |  |  |  |  |  |  |  | Rsad2             | 58185    | 1.539328 | 0.000275 |  |  |  |  |
|  |  |  |  |  |  |  |  | Gbp8              | 76074    | 1.538115 | 0.012018 |  |  |  |  |
|  |  |  |  |  |  |  |  | Gbp3              | 55932    | 1.537651 | 0.000001 |  |  |  |  |
|  |  |  |  |  |  |  |  | Ms4a14            | 383435   | 1.53741  | 0.009656 |  |  |  |  |
|  |  |  |  |  |  |  |  | Cxcl16            | 66102    | 1.536425 | 0.000001 |  |  |  |  |
|  |  |  |  |  |  |  |  | BC14752<br>7      | 625360   | 1.532775 | 0.044774 |  |  |  |  |
|  |  |  |  |  |  |  |  | Gpr84             | 80910    | 1.532571 | 5.8E-05  |  |  |  |  |
|  |  |  |  |  |  |  |  | Gm1580<br>8       | 1E+08    | 1.527257 | 0.029173 |  |  |  |  |
|  |  |  |  |  |  |  |  | Cep55             | 74107    | 1.525596 | 0.000588 |  |  |  |  |
|  |  |  |  |  |  |  |  | Cd22              | 12483    | 1.518063 | 0.001027 |  |  |  |  |
|  |  |  |  |  |  |  |  | C5ar1             | 12273    | 1.51763  | 7.14E-05 |  |  |  |  |
|  |  |  |  |  |  |  |  | Gm1253<br>0       | 329851   | 1.510832 | 0.008588 |  |  |  |  |
|  |  |  |  |  |  |  |  | AU02279<br>3      | 105976   | 1.508559 | 0.018112 |  |  |  |  |
|  |  |  |  |  |  |  |  | C3ar1             | 12267    | 1.507408 | 0.000001 |  |  |  |  |



|  |  |  |  |  |  |  |  |        |        |          |          |  |  |  |  |
|--|--|--|--|--|--|--|--|--------|--------|----------|----------|--|--|--|--|
|  |  |  |  |  |  |  |  | Sgo1   | 72415  | 1.505925 | 0.00055  |  |  |  |  |
|  |  |  |  |  |  |  |  | Ly6g5b | 266614 | 1.504451 | 0.009235 |  |  |  |  |
|  |  |  |  |  |  |  |  | Gbp6   | 100702 | 1.501921 | 0.000413 |  |  |  |  |

**Table S2:** The top 5 gene ontology (GO) terms of the differentially expressed genes detected in the ischemic mouse brain at pre, and post-stroke days 1 and 3.

| Pre                                              |         | Day 1                            |           | Day 3                            |           |
|--------------------------------------------------|---------|----------------------------------|-----------|----------------------------------|-----------|
| GO Term                                          | p-value | GO Term                          | p-value   | GO Term                          | p-value   |
| Biological Processes                             |         |                                  |           |                                  |           |
| Not significant                                  |         | biological regulation            | 0.005     | cellular process                 | 2.498e-4  |
|                                                  |         | regulation of biological process | 0.003     | biological regulation            | 1.701e-12 |
|                                                  |         | regulation of cellular process   | 0.003     | regulation of biological process | 1.264e-14 |
|                                                  |         | response to stimulus             | 1.155e-18 | regulation of cellular process   | 2.072e-11 |
|                                                  |         | multicellular organismal process | 1.080e-11 | response to stimulus             | 1.000e-24 |
| Molecular Functions                              |         |                                  |           |                                  |           |
| signaling receptor regulator activity            | 0.036   | protein binding                  | 0.001     | binding                          | 1.490e-4  |
| signaling receptor activator activity            | 0.021   | signaling receptor binding       | 6.344e-12 | protein binding                  | 4.470e-8  |
| receptor ligand activity                         | 0.021   | molecular function regulator     | 0.026     | identical protein binding        | 3.304e-4  |
| hormone activity                                 | 0.019   | molecular transducer activity    | 5.788e-9  | molecular function regulator     | 0.039     |
| hyaluronic acid binding                          | 0.012   | signaling receptor activity      | 5.788e-9  | signaling receptor binding       | 1.639e-10 |
| Cellular Component                               |         |                                  |           |                                  |           |
| extracellular region                             | 0.003   | cell periphery                   | 2.522e-9  | cellular anatomical entity       | 1.316e-4  |
| extracellular space                              | 0.010   | plasma membrane                  | 1.668e-4  | membrane                         | 1.982e-8  |
| endoplasmic reticulum protein-containing complex | 0.006   | intrinsic component of membrane  | 0.009     | cell periphery                   | 1.000e-24 |
| endoplasmic reticulum lumen                      | 0.014   | integral component of membrane   | 0.010     | plasma membrane                  | 1.496e-20 |
| smooth endoplasmic reticulum                     | 0.010   | extracellular region             | 1.000e-24 | intrinsic component of membrane  | 1.091e-6  |

**Table S3:** Top 30 KEGG pathways of differentially expressed genes in the ischemic mouse brain at pre, and post-stroke days 1 and 3.

| <i>Pre</i> |                                                   |           |           | <i>Day 1</i> |                                                   |           |           | <i>Day 3</i> |                                                   |           |          |
|------------|---------------------------------------------------|-----------|-----------|--------------|---------------------------------------------------|-----------|-----------|--------------|---------------------------------------------------|-----------|----------|
| ID         | Pathway                                           | GeneRatio | p.adjust  | ID           | Pathway                                           | GeneRatio | p.adjust  | ID           | Pathway                                           | GeneRatio | p.adjust |
| mmu05022   | Pathways of neurodegeneration - multiple diseases | 183/1656  | 3.01E-24  | mmu05022     | Pathways of neurodegeneration - multiple diseases | 147/1626  | 7.96E-11  | mmu05022     | Pathways of neurodegeneration - multiple diseases | 270/3179  | 2.95E-21 |
| mmu05010   | Alzheimer disease                                 | 152/1656  | 2.42E-21  | mmu05010     | Alzheimer disease                                 | 120/1626  | 5.671E-09 | mmu05010     | Alzheimer disease                                 | 227/3179  | 2.30E-20 |
| mmu05014   | Amyotrophic lateral sclerosis                     | 140/1656  | 8.35E-18  | mmu05171     | Coronavirus disease - COVID-19                    | 111/1626  | 1.73E-20  | mmu05014     | Amyotrophic lateral sclerosis                     | 210/3179  | 4.20E-16 |
| mmu05016   | Huntington disease                                | 124/1656  | 7.30E-19  | mmu05014     | Amyotrophic lateral sclerosis                     | 99/1626   | 0.0001565 | mmu05016     | Huntington disease                                | 196/3179  | 9.00E-24 |
| mmu05012   | Parkinson disease                                 | 118/1656  | 2.42E-21  | mmu05016     | Huntington disease                                | 98/1626   | 2.607E-08 | mmu05012     | Parkinson disease                                 | 165/3179  | 7.44E-18 |
| mmu05020   | Prion disease                                     | 114/1656  | 8.35E-19  | mmu05020     | Prion disease                                     | 92/1626   | 5.612E-09 | mmu05020     | Prion disease                                     | 161/3179  | 3.34E-15 |
| mmu05171   | Coronavirus disease - COVID-19                    | 95/1656   | 1.88E-12  | mmu05012     | Parkinson disease                                 | 89/1626   | 2.085E-08 | mmu05165     | Human papillomavirus infection                    | 158/3179  | 0.00239  |
| mmu03010   | Ribosome                                          | 91/1656   | 3.18E-21  | mmu04010     | MAPK signaling pathway                            | 87/1626   | 1.092E-05 | mmu05171     | Coronavirus disease - COVID-19                    | 147/3179  | 1.61E-13 |
| mmu05165   | Human papillomavirus infection                    | 85/1656   | 0.0312858 | mmu05165     | Human papillomavirus infection                    | 87/1626   | 0.009166  | mmu04151     | PI3K-Akt signaling pathway                        | 147/3179  | 0.03543  |
| mmu04714   | Thermogenesis                                     | 83/1656   | 3.54E-09  | mmu03010     | Ribosome                                          | 79/1626   | 6.43E-14  | mmu05132     | Salmonella infection                              | 146/3179  | 4.68E-12 |
| mmu04151   | PI3K-Akt signaling pathway                        | 83/1656   | 0.0438969 | mmu05205     | Proteoglycans in cancer                           | 71/1626   | 2.261E-07 | mmu04144     | Endocytosis                                       | 145/3179  | 1.2E-08  |
| mmu05415   | Diabetic cardiomyopathy                           | 77/1656   | 6.67E-09  | mmu04024     | cAMP signaling pathway                            | 69/1626   | 1.396E-05 | mmu04714     | Thermogenesis                                     | 139/3179  | 2.36E-13 |
| mmu05208   | Chemical carcinogenesis - reactive oxygen species | 77/1656   | 8.57E-08  | mmu05132     | Salmonella infection                              | 68/1626   | 0.0018514 | mmu04010     | MAPK signaling pathway                            | 136/3179  | 0.00034  |
| mmu04144   | Endocytosis                                       | 75/1656   | 0.0008963 | mmu04015     | Rap1 signaling pathway                            | 67/1626   | 2.058E-05 | mmu05163     | Human cytomegalovirus infection                   | 130/3179  | 2.6E-06  |
| mmu04010   | MAPK signaling pathway                            | 70/1656   | 0.0384744 | mmu04020     | Calcium signaling pathway                         | 67/1626   | 0.0007936 | mmu05208     | Chemical carcinogenesis - reactive oxygen species | 126/3179  | 9E-10    |
| mmu04723   | Retrograde endocannabinoid signaling              | 67/1656   | 1.42E-12  | mmu05017     | Spinocerebellar ataxia                            | 64/1626   | 5.70E-12  | mmu05170     | Human immunodeficiency virus 1 infection          | 123/3179  | 2.8E-06  |
| mmu04020   | Calcium signaling pathway                         | 67/1656   | 0.0013186 | mmu05163     | Human cytomegalovirus infection                   | 62/1626   | 0.0238932 | mmu05415     | Diabetic cardiomyopathy                           | 120/3179  | 1.9E-09  |
| mmu05017   | Spinocerebellar ataxia                            | 66/1656   | 3.32E-13  | mmu04510     | Focal adhesion                                    | 61/1626   | 0.0001494 | mmu04360     | Axon guidance                                     | 116/3179  | 8.62E-14 |
| mmu05163   | Human cytomegalovirus infection                   | 66/1656   | 0.0095503 | mmu04014     | Ras signaling pathway                             | 61/1626   | 0.0067116 | mmu04014     | Ras signaling pathway                             | 113/3179  | 0.0002   |

|          |                                             |         |           |          |                                                   |         |               |          |                                         |          |          |
|----------|---------------------------------------------|---------|-----------|----------|---------------------------------------------------|---------|---------------|----------|-----------------------------------------|----------|----------|
| mmu05132 | Salmonella infection                        | 65/1656 | 0.0107893 | mmu04062 | Chemokine signaling pathway                       | 60/1626 | 7.089E-05     | mmu03010 | Ribosome                                | 112/3179 | 2.04E-12 |
| mmu04810 | Regulation of actin cytoskeleton            | 64/1656 | 0.0005773 | mmu05417 | Lipid and atherosclerosis                         | 60/1626 | 0.001743      | mmu04020 | Calcium signaling pathway               | 111/3179 | 0.00129  |
| mmu04024 | cAMP signaling pathway                      | 63/1656 | 0.0009535 | mmu05169 | Epstein-Barr virus infection                      | 60/1626 | 0.007088<br>2 | mmu05166 | Human T-cell leukemia virus 1 infection | 108/3179 | 0.01626  |
| mmu04932 | Non-alcoholic fatty liver disease           | 62/1656 | 6.69E-09  | mmu04723 | Retrograde endocannabinoid signaling              | 59/1626 | 1.606E-08     | mmu04510 | Focal adhesion                          | 107/3179 | 1.6E-06  |
| mmu04510 | Focal adhesion                              | 61/1656 | 0.0002427 | mmu05415 | Diabetic cardiomyopathy                           | 59/1626 | 0.001648<br>4 | mmu04015 | Rap1 signaling pathway                  | 107/3179 | 4.6E-05  |
| mmu04141 | Protein processing in endoplasmic reticulum | 60/1656 | 2.83E-06  | mmu04261 | Adrenergic signaling in cardiomyocytes            | 58/1626 | 1.031E-07     | mmu04024 | cAMP signaling pathway                  | 107/3179 | 0.00018  |
| mmu05205 | Proteoglycans in cancer                     | 60/1656 | 0.0007546 | mmu05208 | Chemical carcinogenesis - reactive oxygen species | 58/1626 | 0.007115      | mmu04810 | Regulation of actin cytoskeleton        | 107/3179 | 0.00018  |
| mmu04360 | Axon guidance                               | 59/1656 | 3.71E-05  | mmu05170 | Human immunodeficiency virus 1 infection          | 57/1626 | 0.039735<br>8 | mmu05417 | Lipid and atherosclerosis               | 106/3179 | 0.00013  |
| mmu04014 | Ras signaling pathway                       | 59/1656 | 0.0247004 | mmu04621 | NOD-like receptor signaling pathway               | 55/1626 | 0.011119<br>5 | mmu04062 | Chemokine signaling pathway             | 101/3179 | 6.1E-06  |
| mmu03040 | Spliceosome                                 | 58/1656 | 5.97E-10  | mmu05207 | Chemical carcinogenesis - receptor activation     | 55/1626 | 0.027409<br>9 | mmu05169 | Epstein-Barr virus infection            | 101/3179 | 0.01419  |
| mmu00190 | Oxidative phosphorylation                   | 57/1656 | 2.70E-09  | mmu04714 | Thermogenesis                                     | 55/1626 | 0.041677      | mmu04723 | Retrograde endocannabinoid signaling    | 98/3179  | 4.47E-13 |
